# Supplementary material for: General and precise carbon confinement of functional nanostructures derived from assembled metal–phenolic networks for enhanced lithium storage
Source: Royal Society of Chemistry journal article supplement (doi:10.1039/c8ta06279j), 2018-01-01
Supplement: c8ta06279j1.pdf [file c8ta06279j1.pdf]

## Supporting Information

### **General and Precise Carbon Confinement of Functional Nanostructures Derived from Assembled Metal-Phenolic Network for Enhanced Lithium Storage**

Zhitong Xiao, Jiashen Meng, Qi Li\* Xiao Zhang, Ziang Liu, Bo Wen, Chunhua Han  
and Liqiang Mai\*

State Key Laboratory of Advanced Technology for Materials Synthesis and Processing,  
International School of Materials Science and Engineering, Wuhan University of  
Technology, Luoshi Road 122, Wuhan, 430070, Hubei, China.

\*E-mail: qi.li@whut.edu.cn; mlq518@whut.edu.cn

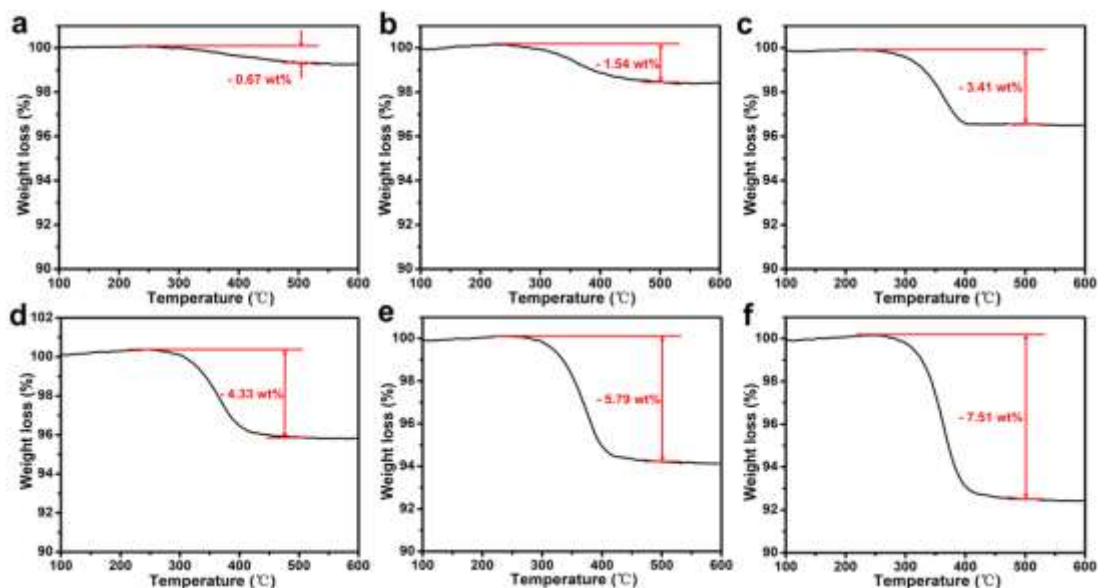

**Fig. S1** (a-f) TG curves of SnO<sub>2</sub>@C-Fe<sub>2</sub>O<sub>3</sub>-1, SnO<sub>2</sub>@C-Fe<sub>2</sub>O<sub>3</sub>-3, SnO<sub>2</sub>@C-Fe<sub>2</sub>O<sub>3</sub>-7, SnO<sub>2</sub>@C-Fe<sub>2</sub>O<sub>3</sub>-10, SnO<sub>2</sub>@C-Fe<sub>2</sub>O<sub>3</sub>-15 and SnO<sub>2</sub>@C-Fe<sub>2</sub>O<sub>3</sub>-20, respectively, in air at 10 °C min<sup>-1</sup>.

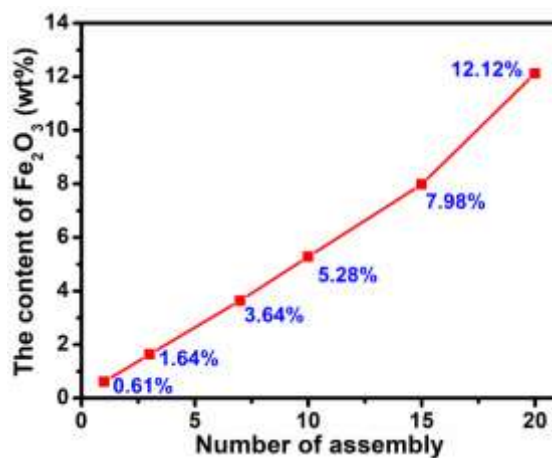

**Fig. S2** The relationship between the content of Fe<sub>2</sub>O<sub>3</sub> and the number of assembly layer according to the ICP results.

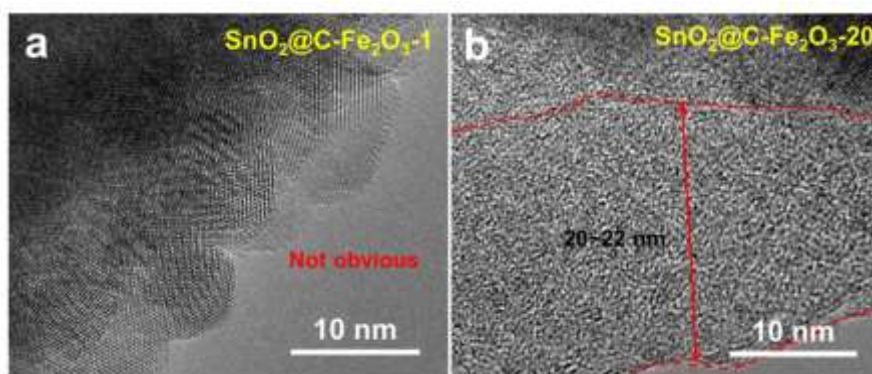

**Fig. S3** (a, b) HRTEM images of  $\text{SnO}_2@\text{C-Fe}_2\text{O}_3\text{-1}$  and  $\text{SnO}_2@\text{C-Fe}_2\text{O}_3\text{-20}$ , respectively.

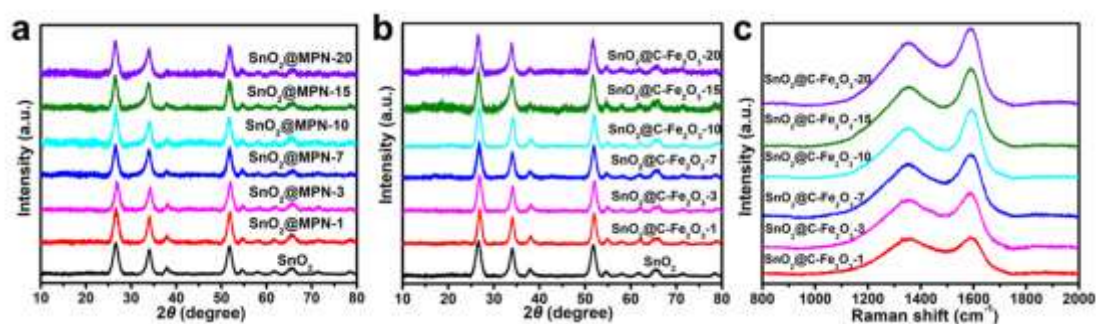

**Fig. S4** (a) XRD patterns of  $\text{SnO}_2$ ,  $\text{SnO}_2@\text{MPN-1}$ ,  $\text{SnO}_2@\text{MPN-3}$ ,  $\text{SnO}_2@\text{MPN-7}$ ,  $\text{SnO}_2@\text{MPN-10}$ ,  $\text{SnO}_2@\text{MPN-15}$  and  $\text{SnO}_2@\text{MPN-20}$ . (b) XRD patterns of  $\text{SnO}_2$ ,  $\text{SnO}_2@\text{C-Fe}_2\text{O}_3\text{-1}$ ,  $\text{SnO}_2@\text{C-Fe}_2\text{O}_3\text{-3}$ ,  $\text{SnO}_2@\text{C-Fe}_2\text{O}_3\text{-7}$ ,  $\text{SnO}_2@\text{C-Fe}_2\text{O}_3\text{-10}$ ,  $\text{SnO}_2@\text{C-Fe}_2\text{O}_3\text{-15}$  and  $\text{SnO}_2@\text{C-Fe}_2\text{O}_3\text{-20}$ . (c) Raman spectra of  $\text{SnO}_2@\text{C-Fe}_2\text{O}_3\text{-1}$ ,  $\text{SnO}_2@\text{C-Fe}_2\text{O}_3\text{-3}$ ,  $\text{SnO}_2@\text{C-Fe}_2\text{O}_3\text{-7}$ ,  $\text{SnO}_2@\text{C-Fe}_2\text{O}_3\text{-10}$ ,  $\text{SnO}_2@\text{C-Fe}_2\text{O}_3\text{-15}$  and  $\text{SnO}_2@\text{C-Fe}_2\text{O}_3\text{-20}$ .

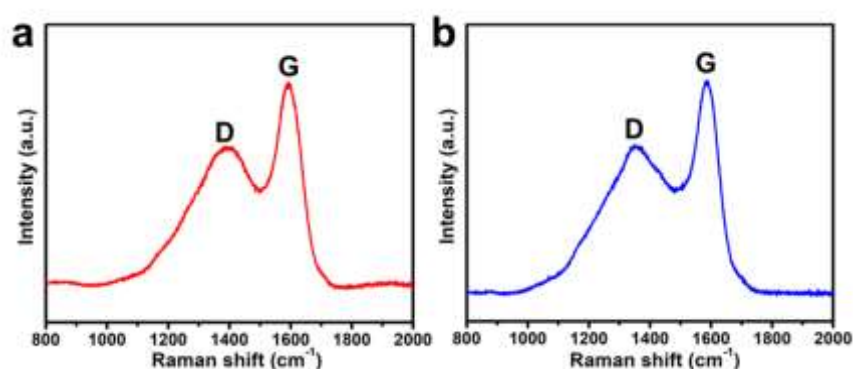

**Fig. S5** (a, b) Raman spectra of the pure carbon derived from gallic acid and pyrogallol acid, respectively.

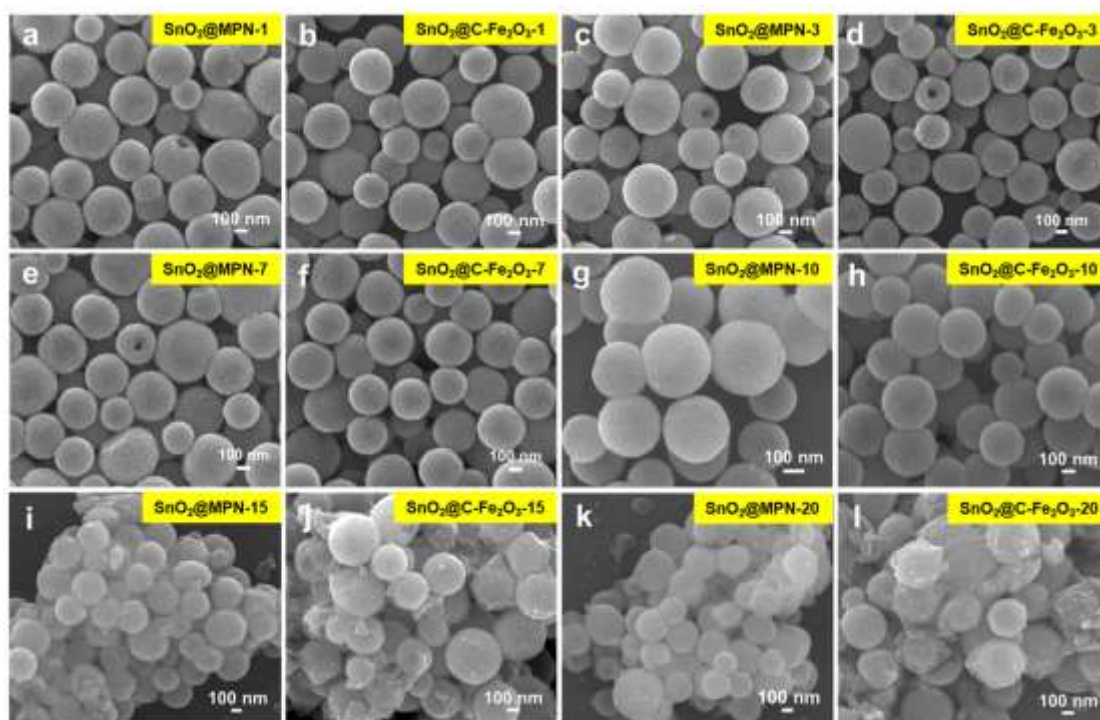

**Fig. S6** (a, c, e, g, i and k) SEM images of SnO<sub>2</sub>@MPN-1, SnO<sub>2</sub>@MPN-3, SnO<sub>2</sub>@MPN-7, SnO<sub>2</sub>@MPN-10, SnO<sub>2</sub>@MPN-15 and SnO<sub>2</sub>@MPN-20, respectively. (b, d, f, h, j and l) SEM images of SnO<sub>2</sub>@C-Fe<sub>2</sub>O<sub>3</sub>-1, SnO<sub>2</sub>@C-Fe<sub>2</sub>O<sub>3</sub>-3, SnO<sub>2</sub>@C-Fe<sub>2</sub>O<sub>3</sub>-7, SnO<sub>2</sub>@C-Fe<sub>2</sub>O<sub>3</sub>-10, SnO<sub>2</sub>@C-Fe<sub>2</sub>O<sub>3</sub>-15 and SnO<sub>2</sub>@C-Fe<sub>2</sub>O<sub>3</sub>-20, respectively.

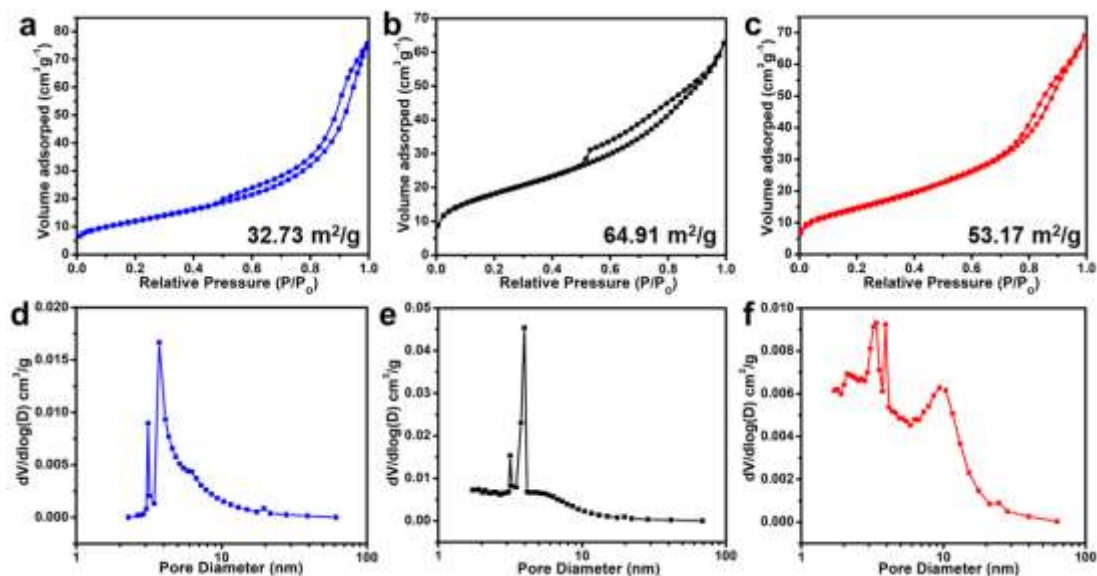

**Fig. S7** (a, d) N<sub>2</sub> adsorption/desorption isotherm and the corresponding pore size distribution of SnO<sub>2</sub>, respectively. (b, e) N<sub>2</sub> adsorption/desorption isotherm and the corresponding pore size distribution of SnO<sub>2</sub>@MPN-10, respectively. (c, f) N<sub>2</sub>

adsorption/desorption isotherm and the corresponding pore size distribution of SnO<sub>2</sub>@C-Fe<sub>2</sub>O<sub>3</sub>-10, respectively.

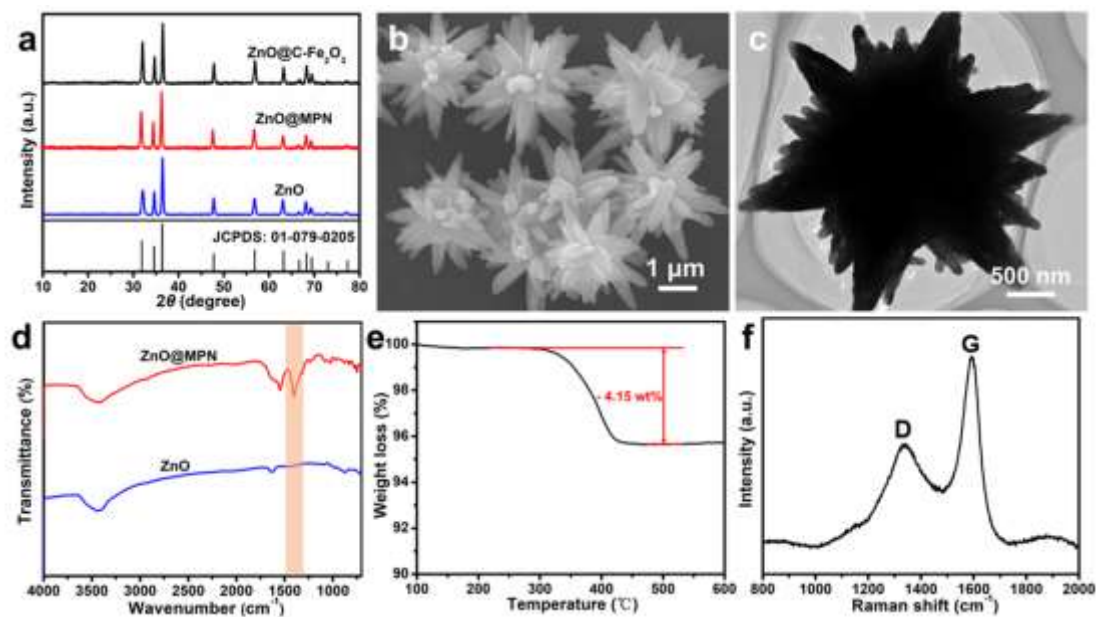

**Fig. S8** (a) XRD patterns of ZnO, ZnO@MPN and ZnO@C-Fe<sub>2</sub>O<sub>3</sub> microflowers. (b, c) SEM and TEM images of ZnO microflowers, respectively. (d) FT-IR spectra of ZnO and ZnO@MPN. (e, f) TG curve and Raman spectrum of ZnO@C-Fe<sub>2</sub>O<sub>3</sub>, respectively.

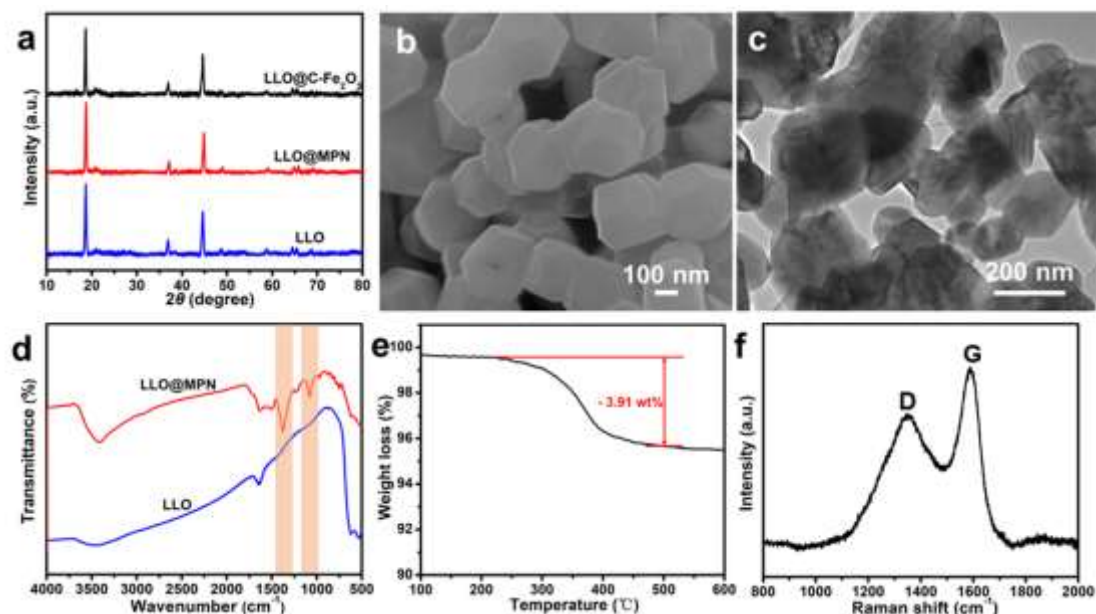

**Fig. S9** (a) XRD patterns of LLO, LLO@MPN and LLO@C-Fe<sub>2</sub>O<sub>3</sub> nanoparticles. (b, c) SEM and TEM images of LLO nanoparticles, respectively. (d) FT-IR spectra of LLO and LLO@MPN. (e, f) TG curve and Raman spectrum of LLO@C-Fe<sub>2</sub>O<sub>3</sub>, respectively.

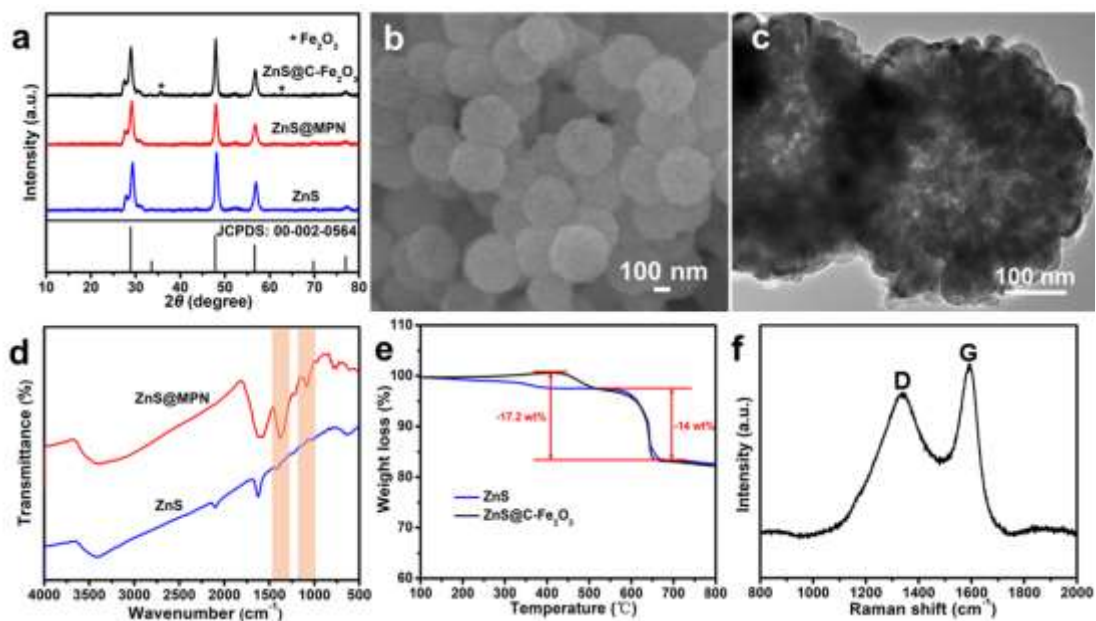

**Fig. S10** (a) XRD patterns of ZnS, ZnS@MPN and ZnS@C-Fe<sub>2</sub>O<sub>3</sub> hollow spheres. (b, c) SEM and TEM images of ZnS hollow spheres, respectively. (d) FT-IR spectra of ZnS and ZnS@MPN. (e, f) TG curve and Raman spectrum of ZnS@C-Fe<sub>2</sub>O<sub>3</sub>, respectively.

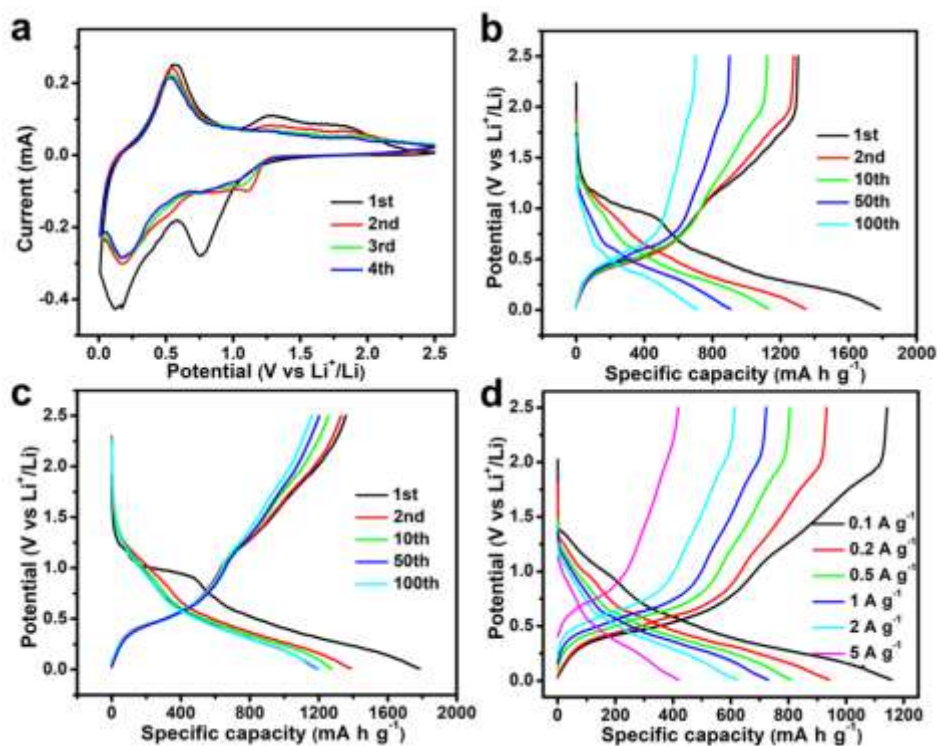

**Fig. S11** (a) CV curves of the first four cycles at the scan rate of 0.2 mV s<sup>-1</sup> of SnO<sub>2</sub> in the 0.01-2.5 V range. (b, c) Charge-discharge curves (for the 1st, 2nd, 10th, 50th and 100th cycles).

100th cycle at the rate of  $0.2 \text{ A g}^{-1}$ ) of  $\text{SnO}_2$  and  $\text{SnO}_2@\text{C-Fe}_2\text{O}_3$ -10, respectively. (d) The charge-discharge voltage profiles of the  $\text{SnO}_2$  at different current densities.

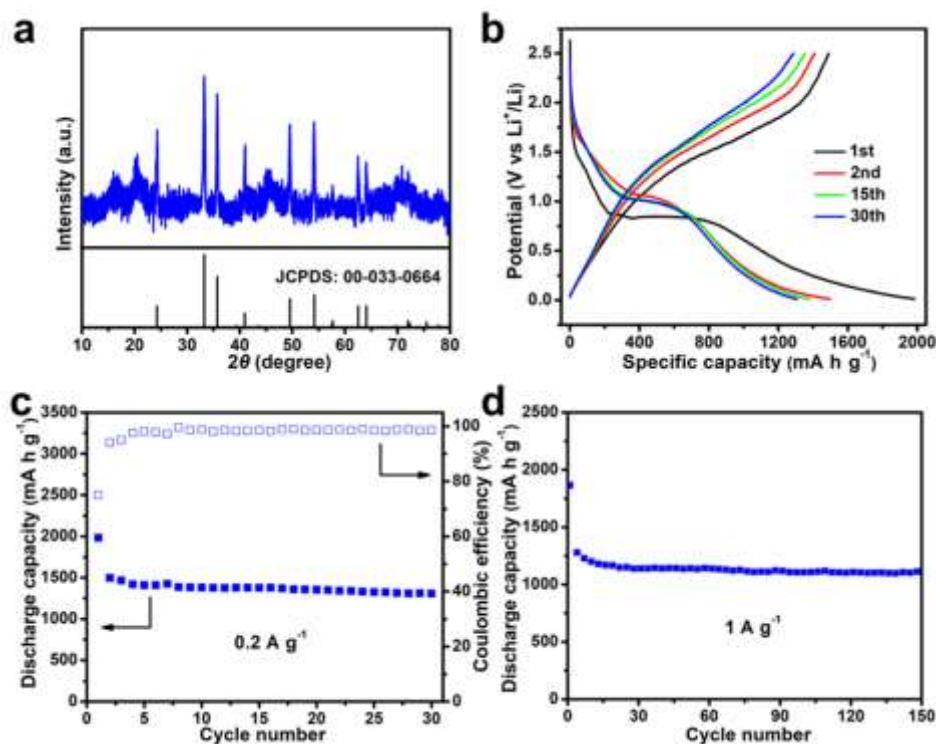

**Fig. S12** (a) XRD patterns of the  $\text{C-Fe}_2\text{O}_3$  derived from pure MPN. (b) Charge-discharge curves (for the 1st, 2nd, 15th and 30th cycle at  $0.2 \text{ A g}^{-1}$ ) of  $\text{C-Fe}_2\text{O}_3$ . (c) Cycling performance and the corresponding Coulombic efficiencies of  $\text{C-Fe}_2\text{O}_3$  at  $0.2 \text{ A g}^{-1}$ . (d) Long-term cycling performance of  $\text{C-Fe}_2\text{O}_3$  at  $1 \text{ A g}^{-1}$ .

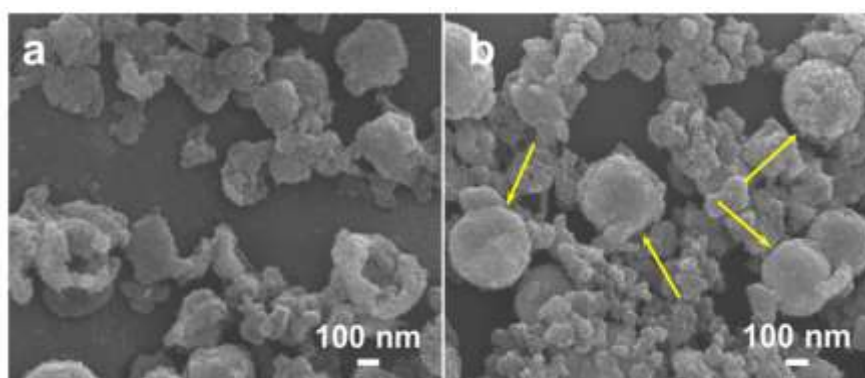

**Fig. S13** (a, b) SEM images after 100 cycles at  $0.2 \text{ A g}^{-1}$  for  $\text{SnO}_2$  and  $\text{SnO}_2@\text{C-Fe}_2\text{O}_3$ -10, respectively.

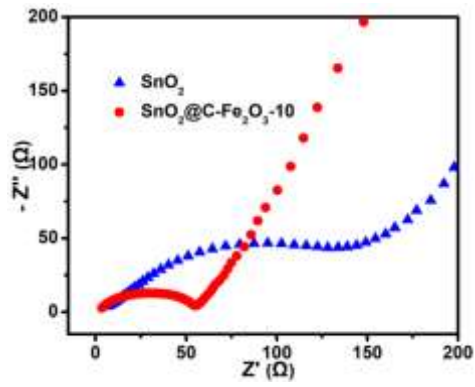

**Fig. S14** Nyquist plots measured at 2.5 V in the frequency range of 100 kHz-0.01 Hz.

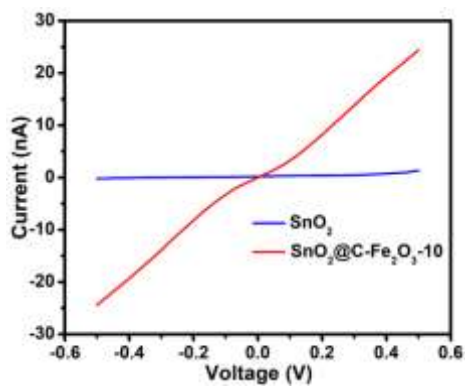

**Fig. S15** I-V curves of  $\text{SnO}_2$  and  $\text{SnO}_2@\text{C-Fe}_2\text{O}_3\text{-10}$ .



**Table S1.** The ICP test results of the SnO<sub>2</sub>@C-Fe<sub>2</sub>O<sub>3</sub>-1, SnO<sub>2</sub>@C-Fe<sub>2</sub>O<sub>3</sub>-3, SnO<sub>2</sub>@C-Fe<sub>2</sub>O<sub>3</sub>-7, SnO<sub>2</sub>@C-Fe<sub>2</sub>O<sub>3</sub>-10, SnO<sub>2</sub>@C-Fe<sub>2</sub>O<sub>3</sub>-15 and SnO<sub>2</sub>@C-Fe<sub>2</sub>O<sub>3</sub>-20.

| Material                                               | Sn : Fe         | The content of Fe <sub>2</sub> O <sub>3</sub> (wt%) |
|--------------------------------------------------------|-----------------|-----------------------------------------------------|
| SnO <sub>2</sub> @C-Fe <sub>2</sub> O <sub>3</sub> -1  | 0.9942 : 0.0058 | 0.61                                                |
| SnO <sub>2</sub> @C-Fe <sub>2</sub> O <sub>3</sub> -3  | 0.9843 : 0.0157 | 1.64                                                |
| SnO <sub>2</sub> @C-Fe <sub>2</sub> O <sub>3</sub> -7  | 0.9644 : 0.0356 | 3.64                                                |
| SnO <sub>2</sub> @C-Fe <sub>2</sub> O <sub>3</sub> -10 | 0.9477 : 0.0523 | 5.28                                                |
| SnO <sub>2</sub> @C-Fe <sub>2</sub> O <sub>3</sub> -15 | 0.9496 : 0.0804 | 7.98                                                |
| SnO <sub>2</sub> @C-Fe <sub>2</sub> O <sub>3</sub> -20 | 0.8754 : 0.1246 | 12.12                                               |

**Table S2.** A comparison of our work and conventional carbon coating methods.

| Coating methods                     | Coating sources | Advantages                                                                                                                                                                                          | Disadvantages                                                                                                                                          | References                                     |
|-------------------------------------|-----------------|-----------------------------------------------------------------------------------------------------------------------------------------------------------------------------------------------------|--------------------------------------------------------------------------------------------------------------------------------------------------------|------------------------------------------------|
| Metal-phenolic network modification | MPN             | <ul style="list-style-type: none"> <li>• Precise control</li> <li>• Simple and fast manipulation</li> <li>• Programmable process</li> <li>• No substrate selectivity</li> <li>• Low cost</li> </ul> | <ul style="list-style-type: none"> <li>• Solvent consuming</li> </ul>                                                                                  | Our work                                       |
| Solution-based polymerization       | Dopamine        | <ul style="list-style-type: none"> <li>• Simple manipulation</li> <li>• Low cost</li> <li>• No substrate selectivity</li> </ul>                                                                     | <ul style="list-style-type: none"> <li>• Solvent consuming</li> <li>• Tedious synthesis process</li> <li>• Hard control on uniform coatings</li> </ul> | <i>Adv. Mater.</i> 2017, <b>29</b> , 1700989.  |
| Low-pressure vapor superassembly    | MOFs            | <ul style="list-style-type: none"> <li>• No solvent consuming</li> <li>• Low cost</li> <li>• Simple manipulation</li> </ul>                                                                         | <ul style="list-style-type: none"> <li>• Substrate material selectivity</li> <li>• Hard control on precise coatings</li> </ul>                         | <i>Nano Lett.</i> 2017, <b>17</b> , 7773-7781. |

|                           |                         |                                                                                                                                                  |                                                                                                                                                        |                                                           |
|---------------------------|-------------------------|--------------------------------------------------------------------------------------------------------------------------------------------------|--------------------------------------------------------------------------------------------------------------------------------------------------------|-----------------------------------------------------------|
|                           |                         |                                                                                                                                                  | <ul style="list-style-type: none"> <li>• Some requirements of operation condition</li> </ul>                                                           |                                                           |
| Sol-gel method            | Citric acid             | <ul style="list-style-type: none"> <li>• Simple manipulation</li> <li>• Low cost</li> <li>• No substrate selectivity</li> </ul>                  | <ul style="list-style-type: none"> <li>• Hard control on uniform coatings</li> <li>• Solvent consuming</li> <li>• Tedious synthesis process</li> </ul> | <i>J. Alloys Compd.</i> 2011, <b>509</b> , 712-718.       |
| Chemical vapor deposition | Carbon                  | <ul style="list-style-type: none"> <li>• Precise control</li> <li>• Uniform deposition</li> <li>• High quality coatings</li> </ul>               | <ul style="list-style-type: none"> <li>• Complex manipulation</li> <li>• High cost</li> <li>• High requirements of operation condition</li> </ul>      | <i>J. Mater. Chem.</i> 2010, <b>20</b> , 595-602.         |
| Atomic layer deposition   | Metal organic compounds | <ul style="list-style-type: none"> <li>• Uniform and conformal deposition</li> <li>• High quality coatings</li> <li>• Precise control</li> </ul> | <ul style="list-style-type: none"> <li>• High cost</li> <li>• Complex manipulation</li> <li>• High requirements of operation condition</li> </ul>      | <i>Energy Environ. Sci.</i> , 2012, <b>5</b> , 6872-6879. |

**Table S3.** Electrochemical performance comparison of various modified SnO<sub>2</sub> anode.

| SnO <sub>2</sub> anode                                          | Voltage range (V) | Current density (mA g <sup>-1</sup> ) | Cycle number | Residual capacity (mA h g <sup>-1</sup> ) | Capacity retention | Reference       |
|-----------------------------------------------------------------|-------------------|---------------------------------------|--------------|-------------------------------------------|--------------------|-----------------|
| <b>SnO<sub>2</sub>@C-Fe<sub>2</sub>O<sub>3</sub>-10</b>         | <b>0.01-</b>      | <b>200</b>                            | <b>100</b>   | <b>1203</b>                               | <b>91 %</b>        | <b>Our work</b> |
|                                                                 | <b>2.5</b>        | <b>1000</b>                           | <b>1000</b>  | <b>1003</b>                               | <b>86 %</b>        |                 |
| Hollow structured                                               |                   |                                       |              |                                           |                    |                 |
| SnO <sub>2</sub> @Si nanospheres                                | 0.01-1            | 300                                   | 500          | 778                                       | 86 %               | S1              |
| RGO/SnO <sub>2</sub> composites                                 | 0.01-2            | 100                                   | 200          | 718                                       | 79 %               | S2              |
| Silver                                                          |                   |                                       |              |                                           |                    |                 |
| nanoparticle-decorated SnO <sub>2</sub> /NiO nanotubes          | 0.01-3            | 1000                                  | 500          | 826                                       | 81 %               | S3              |
| rGO enwrapping                                                  |                   |                                       |              |                                           |                    |                 |
| hollow SnO <sub>2</sub> nanospheres                             | 0.01-3            | 100                                   | 100          | 1107                                      | 82 %               | S4              |
| Sandwiched                                                      |                   |                                       |              |                                           |                    |                 |
| C@SnO <sub>2</sub> @C hollow structures                         | 0.005-3           | 100                                   | 50           | 933                                       | 93 %               | S5              |
| Ultrafine                                                       |                   |                                       |              |                                           |                    |                 |
| SnO <sub>2</sub> /graphene nanocomposite                        | 0.01-3            | 1000                                  | 230          | 970                                       | 97 %               | S6              |
| SnO <sub>2</sub> @Fe <sub>2</sub> O <sub>3</sub> sandwich cubes | 0.01-3            | 100                                   | 200          | 750.8                                     | 83 %               | S7              |

|                                                                    |          |      |     |      |        |     |
|--------------------------------------------------------------------|----------|------|-----|------|--------|-----|
| Carbon coated SnO <sub>2</sub> nanoparticles anchored on CNT       | 0.01-2.5 | 1000 | 150 | 930  | 81 %   | S8  |
| Okra-like SnO <sub>2</sub> encapsulated in nitrogen-doped graphene | 0.01-3   | 200  | 180 | 1041 | 76.4 % | S9  |
| Porous micron-SnO <sub>2</sub> /C composites                       | 0.01-3   | 200  | 100 | 954  | 96 %   | S10 |

#### References

1. T. Ma, X. Yu, H. Li, W. Zhang, X. Cheng, W. Zhu and X. Qiu, *Nano Lett.*, 2017, **17**, 3959-3964.
2. L. Wang, D. Wang, Z. Dong, F. Zhang and J. Jin, *Nano Lett.*, 2013, **13**, 1711-1716.
3. C. Kim, J. W. Jung, K. R. Yoon, D. Y. Youn, S. Park and I. D. Kim, *ACS Nano*, 2016, **10**, 11317-11326.
4. X. Hu, G. Zeng, J. Chen, C. Lu and Z. Wen, *J. Mater. Chem. A*, 2017, **5**, 4535-4542.
5. J. Qin, N. Zhao, C. Shi, E. Liu, F. He, L. Ma, Q. Li, J. Li and C. He, *J. Mater. Chem. A*, 2017, **5**, 10946-10956.
6. W. Chen, K. Song, L. Mi, X. Feng, J. Zhang, S. Cui and C. Liu, *J. Mater. Chem. A*, 2017, **5**, 10027-10038.
7. Y. Zeng, J. Luo, Y. Wang, L. Qiao, B. Zou and W. Zheng, *Nanoscale*, 2017, **9**, 17576-17584.
8. C. Ma, W. Zhang, Y. S. He, Q. Gong, H. Che and Z. F. Ma, *Nanoscale*, 2016, **8**, 4121-4126.
9. X. Zhou, S. Chen, J. Yang, T. Bai, Y. Ren and H. Tian, *ACS Appl. Mater. Interfaces*, 2017, **9**, 14309-14318.
10. M.-S. Wang, M. Lei, Z.-Q. Wang, X. Zhao, J. Xu, W. Yang, Y. Huang and X. Li, *J. Power Sources*, 2016, **309**, 238-244.
